# Supplementary material
Source: PubMed Central journal article supplement (PMC6274644)
Supplement: 41422_2018_109_MOESM1_ESM.pdf [file 41422_2018_109_MOESM1_ESM.pdf]

## 1 **Supplementary information, Data S1**

### 3 **Materials and Methods**

#### 4 ***Protein expression and purification***

5 The full-length gene encoding BzCas13b was synthesized and constructed into cloning  
6 sites between *NdeI* and *XhoI* of pET-30b vector with a C-terminal His-tag. CRISPR template  
7 was synthesized (Supplementary information, Table S2) and constructed into cloning sites  
8 between *NdeI* and *XhoI* of pCDFDuet-1 vector.

9 To obtain the binary complex assembled *in vivo*, vectors encoding the BzCas13b R1177A  
10 mutant and CRISPR template were firstly co-transformed into *E.coli* Rosetta (DE3) cells  
11 (Novagen). The cells were grown at 37°C for 3 hours until OD<sub>600</sub> reached ~0.6, and then  
12 induced with 0.2 mM IPTG at 18°C for 12 hours. The cells were harvested and lysed in  
13 buffer-A (25 mM Tris-HCl (pH 7.5), 500 mM NaCl, 5 mM β-mercaptoethanol, 1 mM PMSF).  
14 The binary complex was firstly purified with a Ni-NTA Superflow (QIAGEN) column. Next,  
15 the target sample was collected and purified with the Heparin HP column (GE Healthcare)  
16 using a salt gradient between buffer-B1 (25 mM Tris-HCl (pH 7.5), 90 mM NaCl, 2 mM  
17 MgCl<sub>2</sub>, 2 mM DTT) and buffer-B2 (25 mM Tris-HCl (pH 7.5), 1 M NaCl, 2 mM MgCl<sub>2</sub>, 2  
18 mM DTT). Then, the target sample was dialyzed in buffer-C (25 mM Tris-HCl (pH 7.5), 200  
19 mM NaCl, 2 mM MgCl<sub>2</sub>, 2 mM DTT) and further purified by using a Superdex 200 Increase  
20 (10/300 GL) column (GE Healthcare). Finally, fractions of the binary complex were  
21 concentrated and preserved at -80°C for later crystallization. The selenomethionine  
22 (SeMet)-labeled binary complex was expressed in *E.coli* Rosetta (DE3) cells grown in M9  
23 minimal medium and supplemented with SeMet, Lys, Phe, Thr, Val, Leu and Ile. The SeMet  
24 BzCas13b binary complex was purified as described above.

25 To prepare the target protein alone, BzCas13b was expressed in *E.coli* Rosetta (DE3) cells  
26 (Novagen). In brief, the target protein was purified with the Ni-NTA Superflow (QIAGEN)  
27 column using buffer-A and further purified with the Heparin HP column (GE Healthcare)  
28 using a salt gradient between buffer-B3 (25 mM Tris-HCl (pH 7.5), 200 mM NaCl, 1 mM  
29 DTT) and buffer-B4 (25 mM Tris-HCl (pH 7.5), 1 M NaCl, 1 mM DTT). Fractions of

30 BzCas13b were dialyzed in buffer-B3, concentrated and preserved for later preparation of the  
31 binary complex with crRNA or the pre-crRNA cleavage assay.

32 To obtain the binary complex assembled *in vitro*, crRNA was heated to 75°C for 5 min and  
33 then cooled on ice. Protein was incubated with crRNA at a molar ratio of 1:1.2 on ice for 1  
34 hour and subsequently purified in buffer-C by using a Superdex 200 (10/300 GL) column  
35 (GE Healthcare). Fractions of the binary complex were collected and concentrated.

### 36 ***Synthesis and purification of pre-crRNA, crRNA and target RNA in vitro***

37 RNA fragments used in this study were synthesized by *in vitro* transcription utilizing T7  
38 RNA polymerase. The synthetic DNA fragment encoding pre-crRNA, crRNA and target  
39 RNA sequences were cloned into sites between *StuI* and *HindIII* of a modified pUC-119  
40 vector.<sup>16</sup> The vector was amplified in *E.coli* DH5 $\alpha$  competent cells (Novagen) and extracted.  
41 After linearization by *HindIII*, the vector was purified by phenol/chloroform extraction and  
42 ethanol precipitation. Transcription reactions were performed at 37°C for 4 hours and in  
43 buffer containing 100 mM HEPES-K (pH 7.9), 20 mM MgCl<sub>2</sub>, 30 mM DTT, 3 mM NTPs, 2  
44 mM spermidine, 30 ng/ $\mu$ l linearized template and 100  $\mu$ g/ml home-made T7 RNA  
45 polymerase. The reaction sample was purified using the denaturing polyacrylamide gel  
46 containing 8 M urea. The RNA band was excised from the gel and eluted by using the Elutrap  
47 system (GE Healthcare). After the treatment of ethanol precipitation, RNA was dissolved in  
48 diethylpyrocarbonate (DEPC)-treated H<sub>2</sub>O and preserved at -80°C.

### 49 ***Site-directed mutagenesis***

50 Vectors encoding the wild-type BzCas13b, pre-crRNA, crRNA were used as templates for  
51 conducting site-directed mutagenesis. Briefly, oligonucleotides for site-directed mutagenesis  
52 were designed and PCRs were carried out to acquire the desired mutations. The successful  
53 mutagenesis was verified by sequencing.

### 54 ***Crystallization***

55 The SeMet-labeled BzCas13b R1177A binary Complex assembled *in vivo* was crystallized  
56 by the hanging-drop vapor diffusion method at 16°C. Crystals were obtained by mixing 1 $\mu$ l  
57 of complex solution ( $A_{280\text{ nm}} = 12.7$ ) and 1 $\mu$ l of reservoir solution (0.15 M Sodium chloride,  
58 0.1 M Lithium sulfate, 0.1 M Sodium citrate (pH 5.5), 22% (w/v) Polyethylene glycol 1000).

59 Crystals grew to their full size within 10 days and cryoprotected in reservoir solution  
60 supplemented with 20% (v/v) glycerol.

#### 61 ***Data collection and structure determination***

62 X-ray diffraction data was collected on beamline BL-17U1 at Shanghai Synchrotron  
63 Radiation Facility (SSRF). Datasets were processed automatically by the program XIA2  
64 integrated into data collection platform of beamline BL-17U1.<sup>17</sup> The crystal structures were  
65 solved by single-wavelength anomalous dispersion method with the program AutoSol in  
66 PHENIX<sup>18</sup> and twelve SeMet sites were identified. There is one binary complex contained in  
67 an asymmetric unit of the crystal structure. Model building was carried out in COOT.<sup>19</sup>  
68 Multiple rounds of refinement was performed using the program REFMAC in CCP4.<sup>20, 21</sup> All  
69 structural figures were prepared using PyMOL (<http://pymol.org>). Data collection and  
70 refinement statistics were listed (Supplementary information, Table S1).

#### 71 ***Pre-crRNA cleavage assay***

72 Pre-crRNA and its mutants were designed to contain two repeat regions separated by a  
73 spacer region (Supplementary information, Table S2). Reactions were performed by  
74 incubating 6.8  $\mu$ M pre-crRNA with 8.2  $\mu$ M purified BzCas13b in 20  $\mu$ l assay buffer (25 mM  
75 Tris-HCl (pH 7.5), 200 mM NaCl, 2 mM MgCl<sub>2</sub>, 1 mM DTT). The cleavage assays were  
76 allowed to proceed at 37°C for 45 minutes. Reactions were stopped synchronously in liquid  
77 nitrogen and further quenched at 75°C for 5 minutes by adding 2 x loading buffer (2 x TBE  
78 buffer, 12 M urea). Samples were analyzed by running a 20% PAGE TBE-urea denaturing  
79 gel. The cleavage assays were repeated three times to confirm the results. The cleavage  
80 products were visualized by using the toluidine blue staining.

#### 81 ***Target RNA cleavage assay***

82 Two target RNAs (target-1 and target-2) were designed to contain different 5'-PFS.  
83 According to the previous study,<sup>5</sup> target-1 contains the nucleotide A of 5'-PFS, whereas  
84 target-2 contains the nucleotide C of 5'-PFS that greatly inhibiting the target RNA cleavage  
85 activity. Reactions were performed by incubating 10  $\mu$ M target RNA with 1  $\mu$ M  
86 BzCas13b-crRNA binary complex in 20  $\mu$ l assay buffer (25 mM Tris-HCl (pH 7.5), 200 mM  
87 NaCl, 2 mM MgCl<sub>2</sub>, 1 mM DTT). The cleavage assays were allowed to proceed at 37°C for

88 30 minutes. The cleavage assays were repeated three times. Reactions and samples were  
89 treated and visualized as described above.

### 90 **RNA sequencing**

91 RNA fragments from the pre-crRNA cleavage assay were purified using the denaturing  
92 polyacrylamide gel as described above. The purified sample was further treated by CIP (calf  
93 intestinal alkaline phosphatase). By using T4 RNA ligase-1, RNA sample was linked to a  
94 synthesized RNA connector containing a 3'-terminal dideoxynucleotide (GenePharma). After  
95 the reverse transcription by using ProtoScript II reverse transcriptase and PCR amplification,  
96 fragments were cloned into pUC-57 vector and sequenced.

97

### 98 **References**

- 99 16 Serganov, A. *et al.* Ribosomal protein S15 from *Thermus thermophilus*--cloning, sequencing,  
100 overexpression of the gene and RNA-binding properties of the protein. *European journal of*  
101 *biochemistry* **246**, 291-300 (1997).
- 102 17 Winter, G., Lobley, C. M. & Prince, S. M. Decision making in xia2. *Acta crystallographica. Section D,*  
103 *Biological crystallography* **69**, 1260-1273, doi:10.1107/S0907444913015308 (2013).
- 104 18 Adams, P. D. *et al.* PHENIX: a comprehensive Python-based system for macromolecular structure  
105 solution. *Acta crystallographica. Section D, Biological crystallography* **66**, 213-221,  
106 doi:10.1107/S0907444909052925 (2010).
- 107 19 Emsley, P. & Cowtan, K. Coot: model-building tools for molecular graphics. *Acta crystallographica.*  
108 *Section D, Biological crystallography* **60**, 2126-2132, doi:10.1107/S0907444904019158 (2004).
- 109 20 Vagin, A. A. *et al.* REFMAC5 dictionary: organization of prior chemical knowledge and guidelines  
110 for its use. *Acta crystallographica. Section D, Biological crystallography* **60**, 2184-2195,  
111 doi:10.1107/S0907444904023510 (2004).
- 112 21 Winn, M. D. *et al.* Overview of the CCP4 suite and current developments. *Acta crystallographica.*  
113 *Section D, Biological crystallography* **67**, 235-242, doi:10.1107/S0907444910045749 (2011).

114 **Supplementary information, Fig. S1**

115

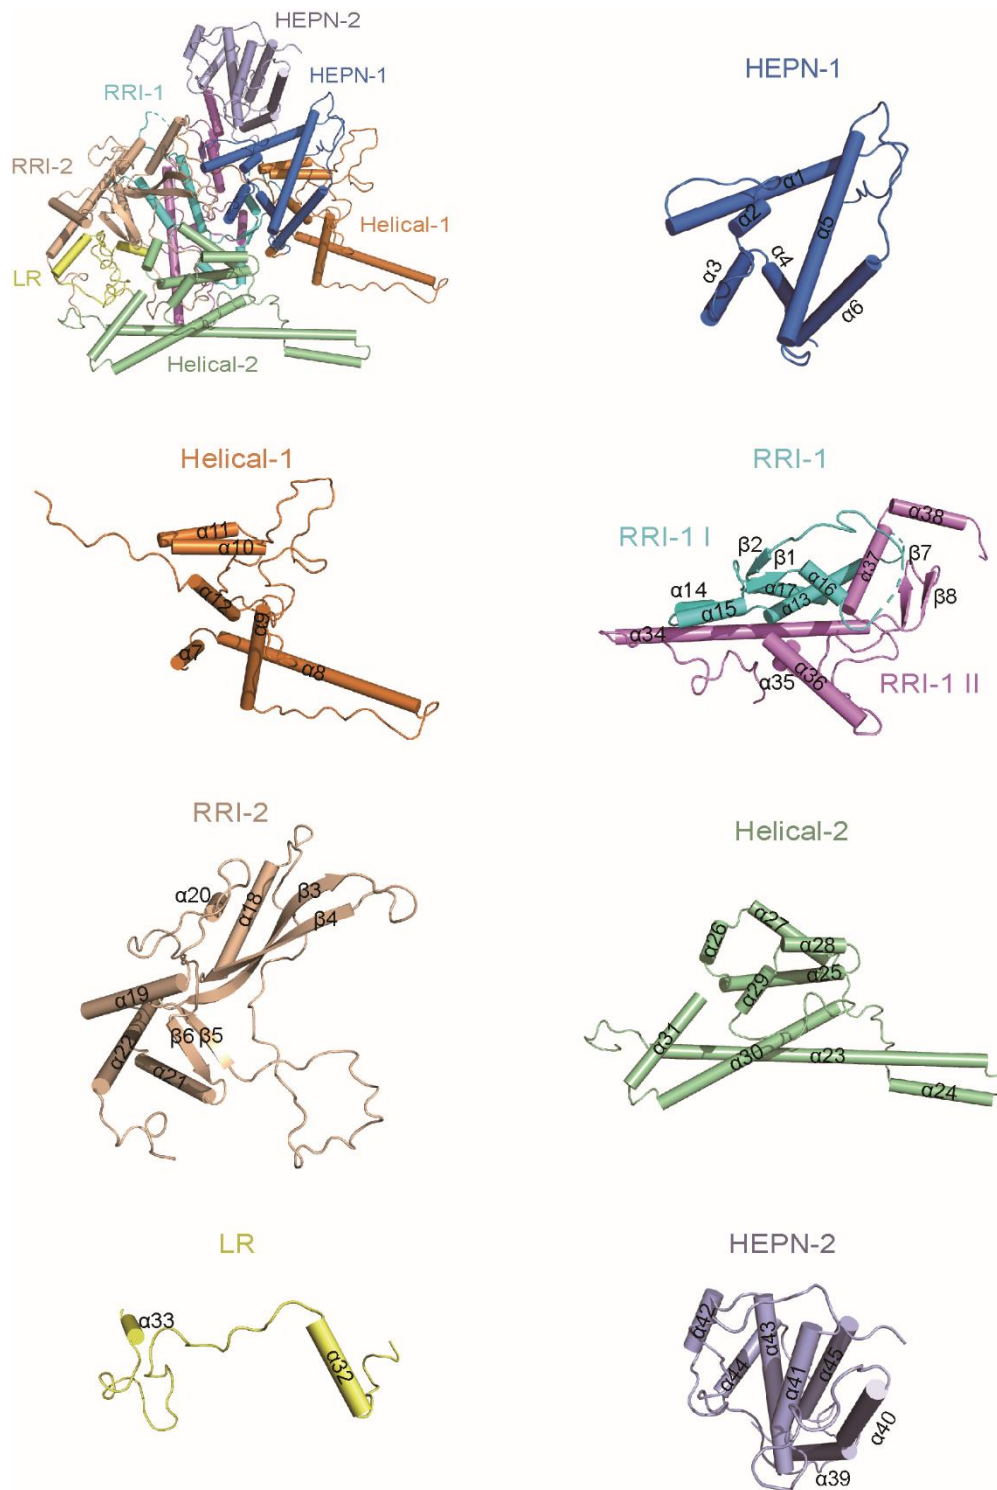

116

117 **Fig. S1** Structures of individual domains and the linker region of BzCas13b in the BzCas13b-crRNA binary  
118 complex. Domains and the linker region (LR) are colored according to Fig. 1, except for RRI-1 II motif colored  
119 in violet.

120

121 **Supplementary information, Fig. S2**

122

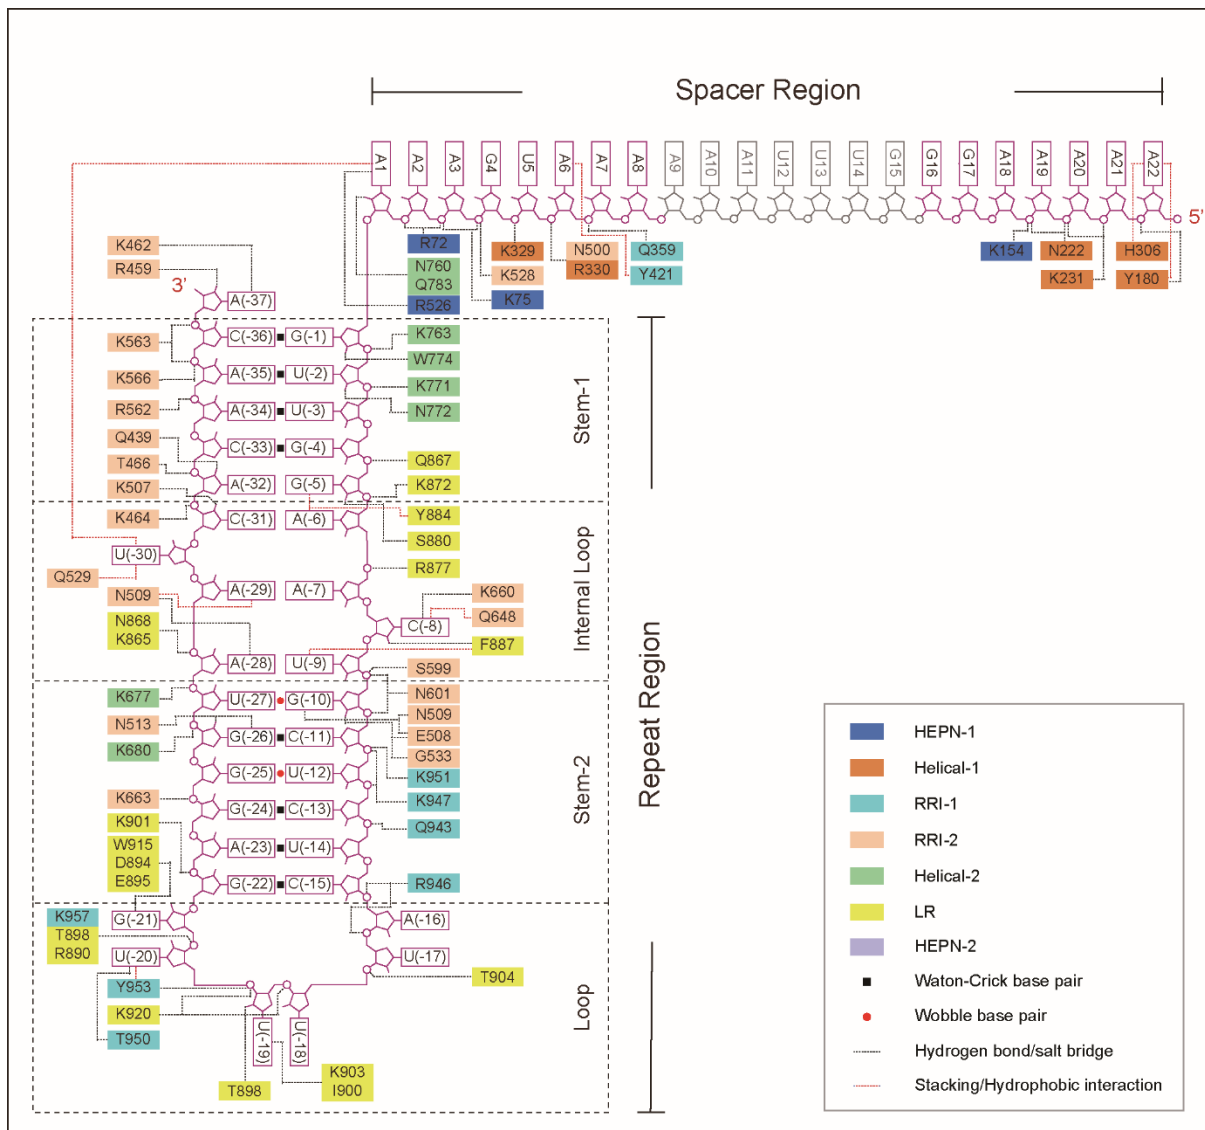

123

124 **Fig. S2** Schematic of crRNA recognition by BzCas13b. Domains, the linker region (LR) and residues are  
 125 colored according to Fig. 1. The disordered nucleotides are colored in grey. Hydrogen bonds and salt bridges are  
 126 shown as black dashed lines. Stackings and hydrophobic interactions are shown as red dashed lines.

127 **Supplementary information, Fig. S3**

128

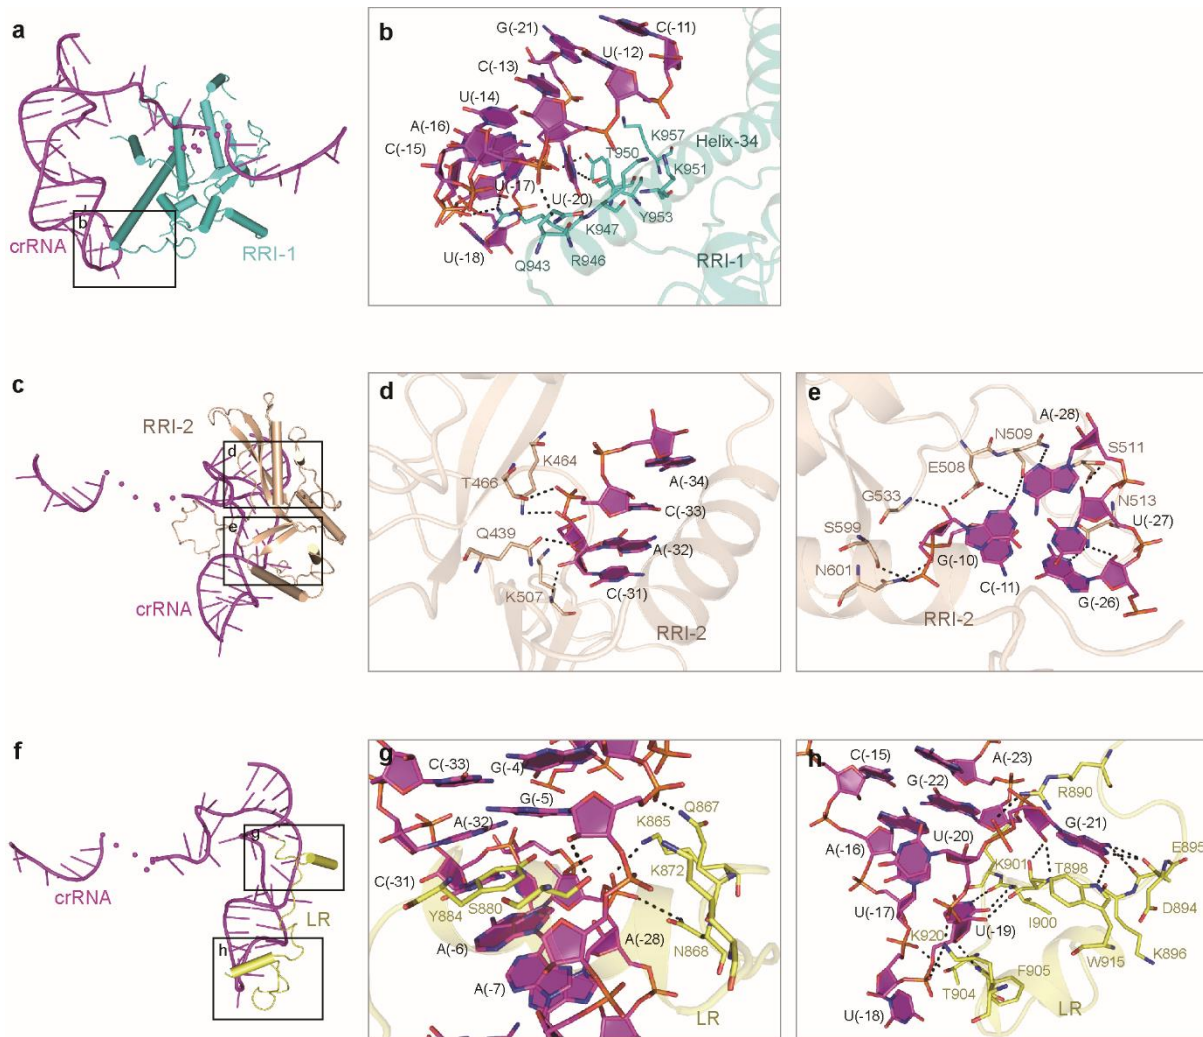

129

130 **Fig. S3** Detailed interactions of crRNA with different domains and the linker region of BzCas13b. **a, b** Detailed  
 131 interactions of crRNA with RRI-1 domain. Hydrogen bonds are shown as dashed lines. Domain and residues are  
 132 colored according to Fig. 1. **c-e** Detailed interactions of crRNA with RRI-2 domain. **f-h** Detailed interactions of  
 133 crRNA with the linker region (LR). The linker region and residues are colored according to Fig. 1.

134 **Supplementary information, Fig. S4**

135

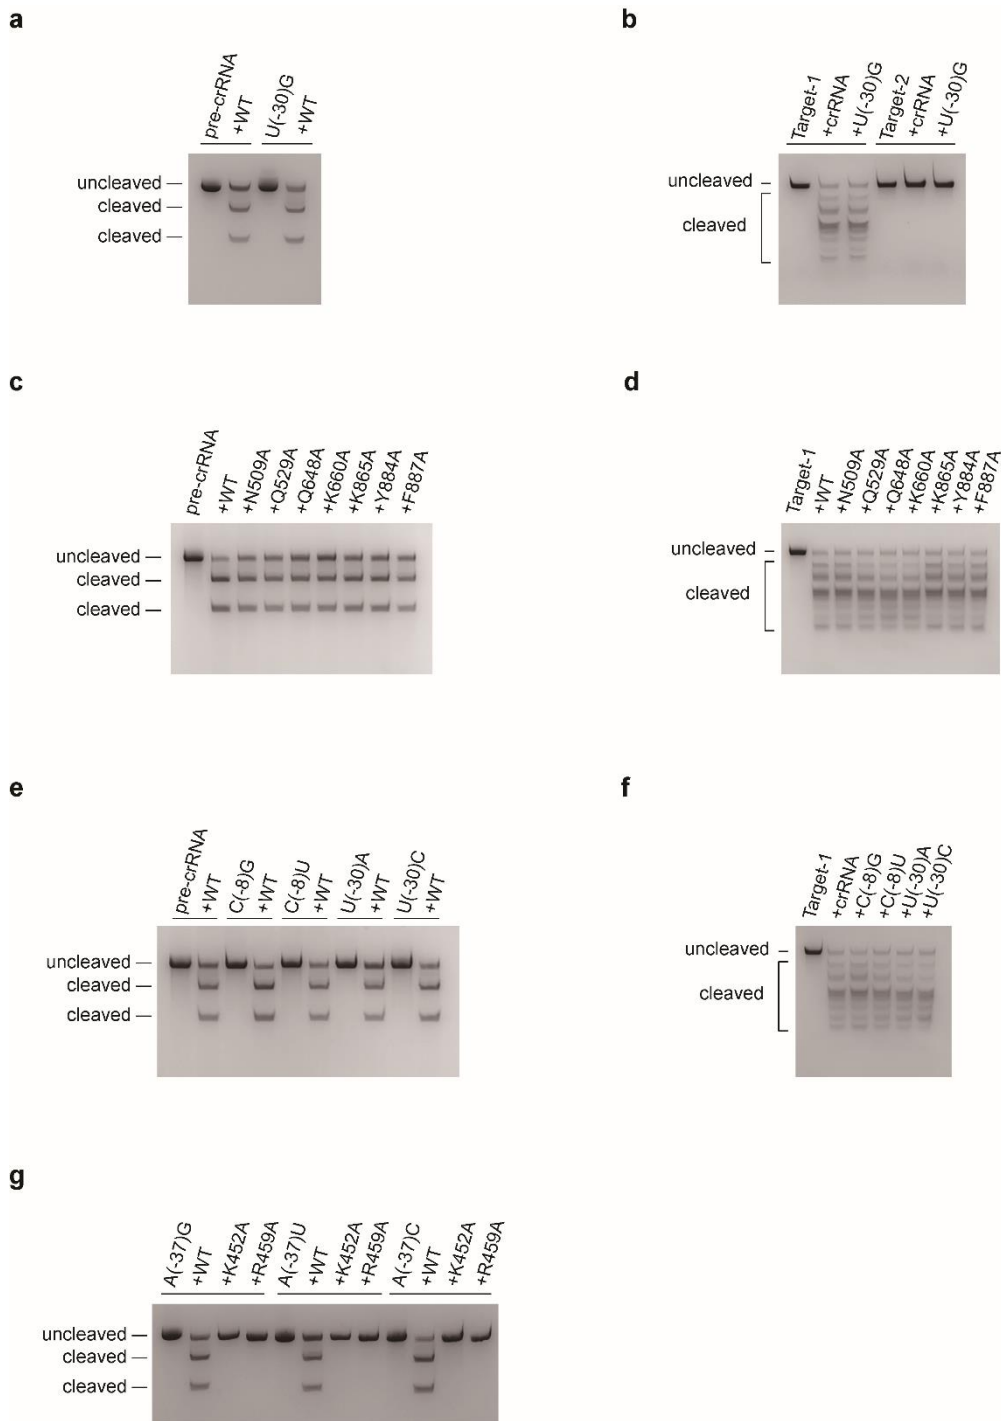

136

137 **Fig. S4** The pre-crRNA processing and target RNA cleavage by BzCas13b. **a** Denaturing gel demonstrating the  
 138 cleavage of pre-crRNA and the U(-30)G pre-crRNA mutant by wild-type BzCas13b. **b** Denaturing gel  
 139 demonstrating the cleavage of target-1 and target-2 RNAs by wild-type BzCas13b in complex with crRNA and  
 140 the U(-30)G crRNA mutant, respectively. **c** Denaturing gel demonstrating the cleavage of pre-crRNA by



141 wild-type BzCas13b and the mutants. **d** Denaturing gel demonstrating the cleavage of target-1 RNA by  
142 wild-type BzCas13b and the mutants in complex with crRNA. **e** Denaturing gel demonstrating the cleavage of  
143 pre-crRNA, the C(-8)G, C(-8)U, U(-30)A and U(-30)C pre-crRNA mutants by wild-type BzCas13b. **f**  
144 Denaturing gel demonstrating the cleavage of target-1 RNA by wild-type BzCas13b in complex with crRNA,  
145 the C(-8)G, C(-8)U, U(-30)A and U(-30)C crRNA mutants, respectively. **g** Denaturing gel demonstrating the  
146 cleavage of A(-37)G, A(-37)U and A(-37)C pre-crRNA mutants by wild-type BzCas13b, the K452A and  
147 R459A mutants, respectively.

148 **Supplementary information, Fig. S5**

149

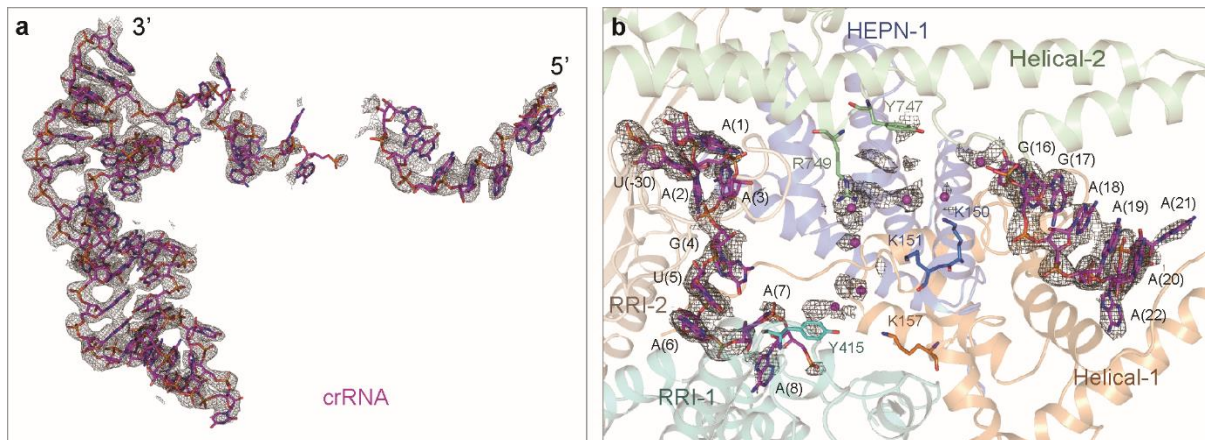

150

151 **Fig. S5** Electron density map of crRNA in the BzCas13b-crRNA binary complex. **a** The electron density map of  
152 crRNA in the binary complex. The 2Fo-Fc omit map is contoured at 1.0  $\sigma$  level. **b** The discontinuous electron  
153 density of G(15)-A(9) located between Helical-1 and HEPN-1 domains. The 2Fo-Fc omit map is contoured at  
154 1.0  $\sigma$  level. Domains and residues are colored according to Fig. 1. Dots represent possible positions of the  
155 disordered nucleotides within the spacer region. Residues speculated to interact with the disordered nucleotides  
156 are shown.

157

158 **Supplementary information, Fig. S6**

159

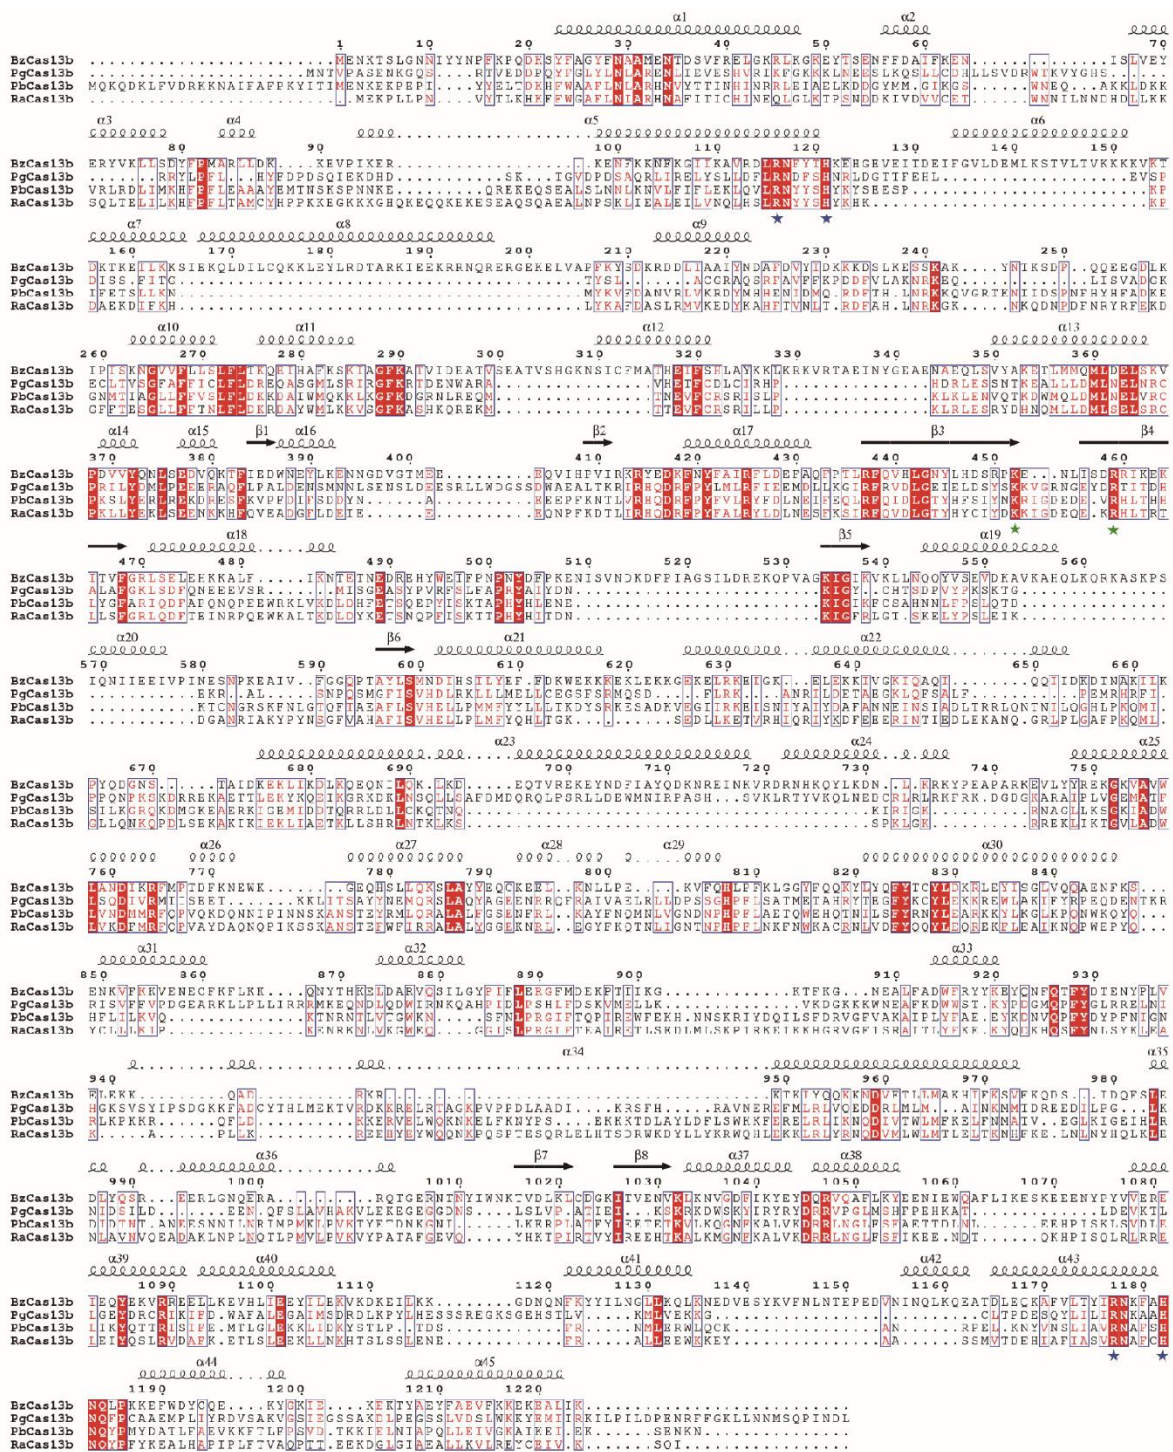

160

161 **Fig. S6** Multiple sequence alignment of Cas13b proteins from different species. Sequence alignment of

162 BzCas13b (*Bergeyella zoohelcum* Cas13b), PgCas13b (*Porphyromonas gingivalis* Cas13b), PbCas13b

163 (*Prevotella buccae* Cas13b) and RaCas13b (*Riemerella anatipestifer* Cas13b) was generated using Clustal

164 Omega and the figure was prepared using ESPript (<http://esprict.ibcp.fr>). The secondary structure of BzCas13b  
165 is shown above the sequence. Identical and similar residues are highlighted in red and white boxes, respectively.  
166 Catalytic residues involved in the pre-crRNA cleavage and target RNA cleavage are marked with green and blue  
167 stars, respectively.

168 **Supplementary information, Fig. S7**

169

**a**

The A(-37)G pre-crRNA mutant:

5'-GUUGGAACUGCUCUCAUUUUGGAGGGUAAUCACAACGAAUGAUAAAAAGGGUUUAAAAAUGAAAGUUGGAACUGCUCUCAU  
 UUUGGAGGGUAAUCACAAC-3'

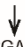

RNA sequencing connector:

5'-AAGUUAAAAUAAGGCUAGUCCGUUAUCAACUUGAAAAAGUGGACCGAGUCGGUGCUU-ddC-3'

**b**

NNNNNNNNGNCTCTTCGCTATTACGCCAGCTGGCGAAAGGGGGATGTGCTGCAAGGCGATTAAGTTGGGTAAACGCCAGGGTTTTCC  
 CCAGTCACGACGTTGTAAAACGACGGCCAGTGAATTCGAGCTCGGTACCTCGCGAATGCATCTAGATCAGGGTTGGAACCTGCTCTCA  
 TTTTGGAGGGTAATCACAACGAAGTTAAAATAAGCTAGTCCGTTATCAACTTGAAAAAGTGGCACCGAGTCGGTGCTTATCGGATCCC  
 GGGCCCGTCGACTGCAGAGGCCTGCATGCAAGCTTGGCGTAATCATGGTCATAGCTGTTTCCTGTGAAATTGTTATCCGCTCACA  
 ATTCCACACAACATACGAGCCGGAAGCATAAAGTAAAGCCTGGGGTGCCTAATGAGTGAGCTAACTCACATTAATTGCGTTGCGC  
 TCACTGCCCGCTTCCAGTCGGGAAACCTGTCGTGCCAGCTGCATTAATGAATCGGCCAACGCGCGGGGAGAGCGGTTTTCGCTAT  
 TGGGCGCTCTCCGCTTCCGCTCCTCGCTCACTGACTCGCTGCGCTCGGTGCTTCGGCTGCGGCGAGCGGTATCAGCTCACTCAAAGGCGG  
 TAATACGGTTATCCACAGAATCAGGGGATAACGCAGGAAAGAACATGTGAGCAAAGGCCAGCAAAGGCCAGGAACCGTAAAAAG

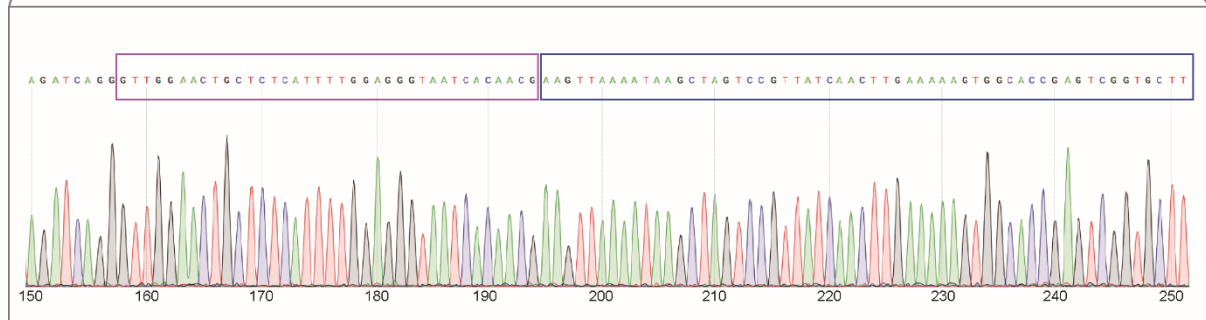

170

171 **Fig. S7** Determination of the pre-crRNA cleavage site by RNA sequencing. **a** The A(-37)G pre-crRNA mutant was  
 172 processed by BzCas13b, after which the short 5'-RNA fragment from the cleavage assay was retrieved as  
 173 described in Materials and Methods. The black arrow indicates the putative cleavage site. The short 5'-RNA  
 174 fragment was linked to a synthesized RNA connector containing a 3'-terminal dideoxynucleotide (GenePharma)  
 175 by using T4 RNA ligase-1. **b** After the reverse transcription and PCR amplification, fragments were cloned into  
 176 pUC-57 vector and sequenced. The result indicates that BzCas13b processes pre-crRNA one nucleotide  
 177 3'-downstream of the crRNA repeat region.

178

179 **Supplementary information, Fig. S8**

180

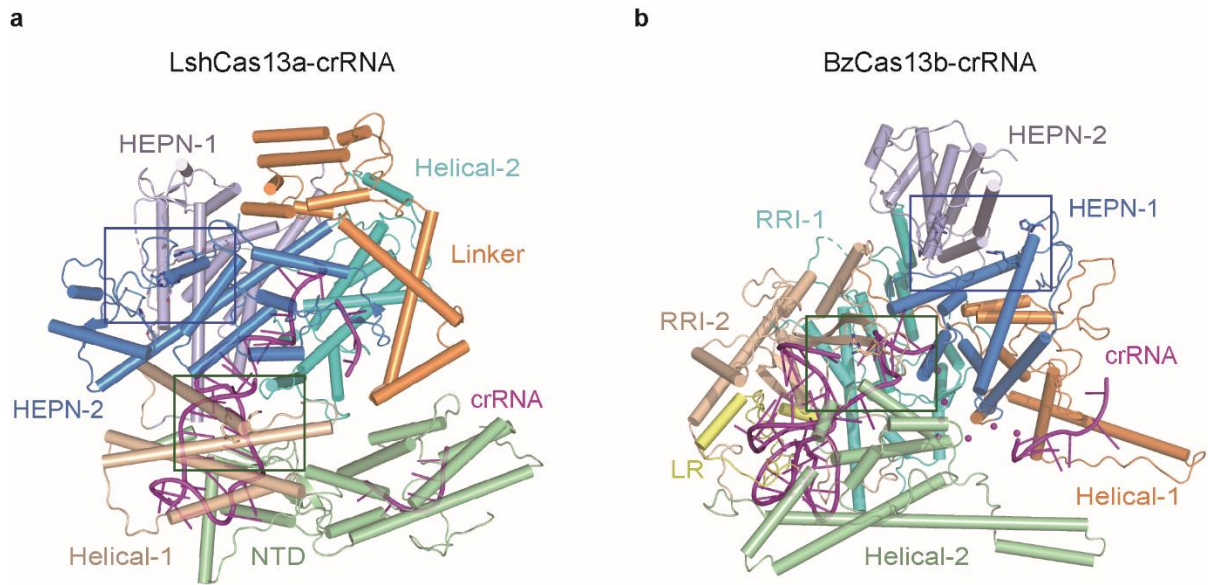

182 **Fig. S8** Comparison of Cas13a and Cas13b. **a, b** Comparison of domain architectures of the LshCas13a-crRNA

183 (*Leptotrichia shahii* Cas13a-crRNA, PDB code: 5WTK) and BzCas13b-crRNA binary complexes. The catalytic

184 sites for the cleavages of pre-crRNA and target RNA are marked with green and blue boxes, respectively.

185 **Supplementary information, Fig. S9**

186

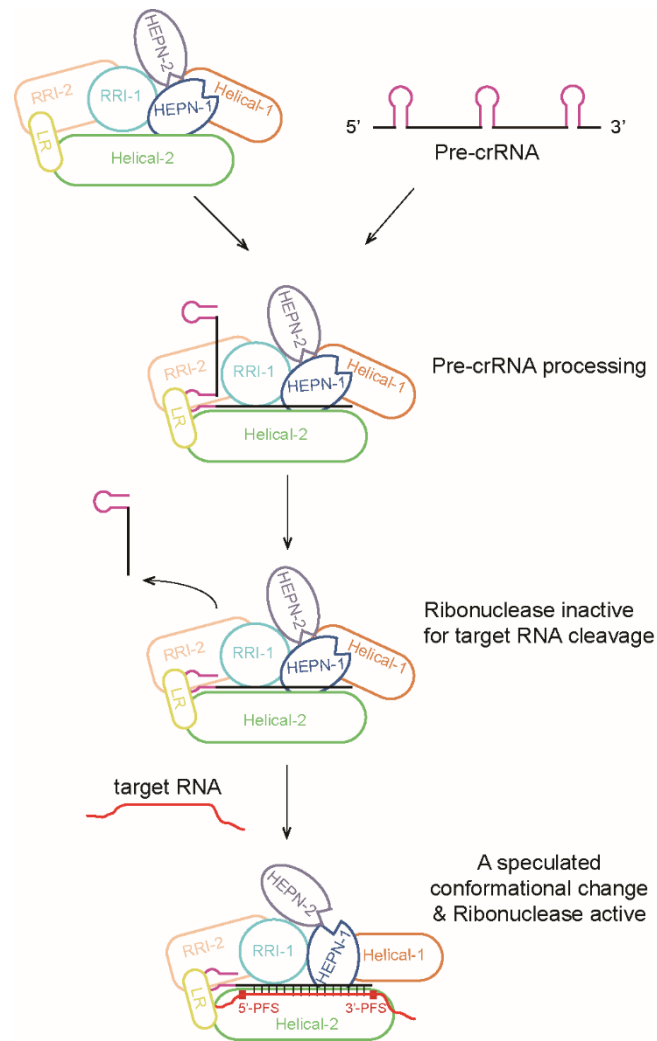

187

188 **Fig. S9** Model of crRNA-guided RNA cleavage by Cas13b. Cas13b recognizes the repeat region of pre-crRNA  
189 and uses RRI-2 domain to process pre-crRNA into a mature crRNA. Upon recurrent infection, Cas13b utilizes  
190 crRNA to interrogate the invading RNA. The target RNA binding is speculated to rearrange the conformation of  
191 Cas13b, and the ribonuclease is fully activated by a double-sided PFS dependent manner to cleave the target and  
192 collateral RNAs.

193 **Supplementary information, Table S1**

194

195 **Table S1. X-ray crystallography data collection and refinement statistics.**

| <b>Dataset</b>                                          | <b>SeMet-BzCas13b-R1177A-crRNA</b> |
|---------------------------------------------------------|------------------------------------|
| <b>Data collection</b>                                  |                                    |
| Beamline                                                | BL-17U1, SSRF                      |
| Wavelength (Å)                                          | 0.9792                             |
| Space group                                             | $P4_12_12$                         |
| Cell dimensions                                         |                                    |
| <i>a</i> , <i>b</i> , <i>c</i> (Å)                      | 196.74, 196.74, 96.23              |
| $\alpha$ , $\beta$ , $\gamma$ (°)                       | 90, 90, 90                         |
| Resolution range (Å)*                                   | 62.21-2.79 (2.89-2.79)             |
| Completeness (%)                                        | 99.88 (100.00)                     |
| <i>I</i> / $\sigma$ ( <i>I</i> )                        | 12.67 (2.04)                       |
| <i>R</i> <sub>merge</sub>                               | 0.053 (0.316)                      |
| Multiplicity                                            | 25.0 (28.0)                        |
| CC half                                                 | 0.994 (0.660)                      |
| Anomalous completeness (%)                              | 100.0 (100.0)                      |
| Anomalous multiplicity                                  | 13.2 (14.6)                        |
| <b>Refinement</b>                                       |                                    |
| Resolution (Å)                                          | 2.79                               |
| No. reflections                                         | 47,452                             |
| <i>R</i> <sub>work</sub> / <i>R</i> <sub>free</sub> (%) | 22.2/ 28.6                         |
| No. atoms                                               |                                    |
| Protein                                                 | 10,107                             |
| Nucleic acid                                            | 1,118                              |
| Solvent                                                 | 37                                 |
| <i>B</i> -factors (Å <sup>2</sup> )                     |                                    |
| Protein                                                 | 72.19                              |
| Nucleic acid                                            | 74.68                              |
| solvent                                                 | 55.69                              |
| R.m.s deviations                                        |                                    |
| Bond length (Å)                                         | 0.012                              |
| Bond angles (°)                                         | 1.73                               |
| Ramachandran plot (%)                                   |                                    |
| Favored region                                          | 96.73                              |
| Allowed region                                          | 3.11                               |
| Outliers region                                         | 0.17                               |

196 \*Highest resolution shell is shown in parentheses.



197 **Supplementary information, Table S2**

198

199 **Table S2. RNA coding sequences used in the study.**

| Description                          | RNA coding sequences                                                                                                                                                                                                                                                                                                                                                                                                                                                                                                                                                            |
|--------------------------------------|---------------------------------------------------------------------------------------------------------------------------------------------------------------------------------------------------------------------------------------------------------------------------------------------------------------------------------------------------------------------------------------------------------------------------------------------------------------------------------------------------------------------------------------------------------------------------------|
| CRISPR RNA                           | GTTGGAAGTCTCTCATTTCATTTGGAGGGTAATCACAACAAATGATAAAA<br>AAGGGTTTAAAAAATGAAAGTTGGAAGTCTCTCATTTCATTTGGAGGGTA<br>ATCACAACAAATGATAAAAAAGGGTTTAAAAAATGAAAGTTGGAAGT<br>GCTCTCATTTCATTTGGAGGGTAATCACAACAAATGATAAAAAAGGGTTA<br>AAAAATGAAAGTTGGAAGTCTCTCATTTCATTTGGAGGGTAATCACAACA<br>AATGATAAAAAAGGGTTTAAAAAATGAAAGTTGGAAGTCTCTCATT<br>TTGGAGGGTAATCACAACAAATGATAAAAAAGGGTTTAAAAAATGA<br>AAGTTGGAAGTCTCTCATTTCATTTGGAGGGTAATCACAACAAATGATAA<br>AAAAGGGTTTAAAAAATGAAAGTTGGAAGTCTCTCATTTCATTTGGAGGG<br>TAATCACAACAAATGATAAAAAAGGGTTTAAAAAATGAAAGTTGGA<br>ACTGCTCTCATTTCATTTGGAGGGTAATCACAAC |
| Pre-crRNA                            | GTTGGAAGTCTCTCATTTCATTTGGAGGGTAATCACAACAAATGATAAAA<br>AAGGGTTTAAAAAATGAAAGTTGGAAGTCTCTCATTTCATTTGGAGGGTA<br>ATCACAAC                                                                                                                                                                                                                                                                                                                                                                                                                                                            |
| The $\Delta$ C(-8) pre-crRNA mutant  | GTTGGAATGCTCTCATTTCATTTGGAGGGTAATCACAACAAATGATAAAA<br>AGGGTTTAAAAAATGAAAGTTGGAATGCTCTCATTTCATTTGGAGGGTAAT<br>CACAAC                                                                                                                                                                                                                                                                                                                                                                                                                                                             |
| The $\Delta$ U(-30) pre-crRNA mutant | GTTGGAAGTCTCTCATTTCATTTGGAGGGTAACACAACAAATGATAAAA<br>AGGGTTTAAAAAATGAAAGTTGGAAGTCTCTCATTTCATTTGGAGGGTAA<br>CACAAC                                                                                                                                                                                                                                                                                                                                                                                                                                                               |
| The A(-37)G pre-crRNA mutant         | GTTGGAAGTCTCTCATTTCATTTGGAGGGTAATCACAACGAATGATAAAA<br>AAGGGTTTAAAAAATGAAAGTTGGAAGTCTCTCATTTCATTTGGAGGGTA<br>ATCACAAC                                                                                                                                                                                                                                                                                                                                                                                                                                                            |
| The A(-37)U pre-crRNA mutant         | GTTGGAAGTCTCTCATTTCATTTGGAGGGTAATCACAACAAATGATAAAA<br>AAGGGTTTAAAAAATGAAAGTTGGAAGTCTCTCATTTCATTTGGAGGGTA<br>ATCACAAC                                                                                                                                                                                                                                                                                                                                                                                                                                                            |
| The A(-37)C pre-crRNA mutant         | GTTGGAAGTCTCTCATTTCATTTGGAGGGTAATCACAACAAATGATAAAA<br>AAGGGTTTAAAAAATGAAAGTTGGAAGTCTCTCATTTCATTTGGAGGGTA<br>ATCACAAC                                                                                                                                                                                                                                                                                                                                                                                                                                                            |
| The U(-30)G pre-crRNA mutant         | GTTGGAAGTCTCTCATTTCATTTGGAGGGTAAGCACAACAAATGATAAAA<br>AAGGGTTTAAAAAATGAAAGTTGGAAGTCTCTCATTTCATTTGGAGGGTA<br>AGCACAAC                                                                                                                                                                                                                                                                                                                                                                                                                                                            |
| The U(-30)A pre-crRNA mutant         | GTTGGAAGTCTCTCATTTCATTTGGAGGGTAAACACAACAAATGATAAAA<br>AAGGGTTTAAAAAATGAAAGTTGGAAGTCTCTCATTTCATTTGGAGGGTA<br>AACACAAC                                                                                                                                                                                                                                                                                                                                                                                                                                                            |
| The U(-30)C pre-crRNA mutant         | GTTGGAAGTCTCTCATTTCATTTGGAGGGTAACCACAACAAATGATAAAA<br>AAGGGTTTAAAAAATGAAAGTTGGAAGTCTCTCATTTCATTTGGAGGGTA<br>ACCACAAC                                                                                                                                                                                                                                                                                                                                                                                                                                                            |
| The C(-8)G pre-crRNA mutant          | GTTGGAAGTCTCTCATTTCATTTGGAGGGTAATCACAACAAATGATAAAA<br>AAGGGTTTAAAAAATGAAAGTTGGAAGTCTCTCATTTCATTTGGAGGGTA<br>ATCACAAC                                                                                                                                                                                                                                                                                                                                                                                                                                                            |
| The C(-8)U pre-crRNA mutant          | GTTGGAATTGCTCTCATTTCATTTGGAGGGTAATCACAACAAATGATAAAA<br>AAGGGTTTAAAAAATGAAAGTTGGAATTGCTCTCATTTCATTTGGAGGGTA<br>ATCACAAC                                                                                                                                                                                                                                                                                                                                                                                                                                                          |
| crRNA                                | AAATGATAAAAAAGGGTTTAAAAAATGAAAGTTGGAAGTCTCTCAT<br>TTTGGAGGGTAATCACAAC                                                                                                                                                                                                                                                                                                                                                                                                                                                                                                           |
| The $\Delta$ C(-8) crRNA mutant      | AAATGATAAAAAAGGGTTTAAAAAATGAAAGTTGGAATGCTCTCATT<br>TTGGAGGGTAATCACAAC                                                                                                                                                                                                                                                                                                                                                                                                                                                                                                           |
| The $\Delta$ U(-30) crRNA mutant     | AAATGATAAAAAAGGGTTTAAAAAATGAAAGTTGGAAGTCTCTCAT<br>TTTGGAGGGTAACACAAC                                                                                                                                                                                                                                                                                                                                                                                                                                                                                                            |
| The U(-30)G crRNA mutant             | AAATGATAAAAAAGGGTTTAAAAAATGAAAGTTGGAAGTCTCTCAT<br>TTTGGAGGGTAAGCACAAC                                                                                                                                                                                                                                                                                                                                                                                                                                                                                                           |

---

|                          |                                                                              |
|--------------------------|------------------------------------------------------------------------------|
| The U(-30)A crRNA mutant | AAATGATAAAAAAGGGTTTAAAAAATGAAAGTTGGAAGTGGAACTGCTCTCAT<br>TTTGGAGGGTAAACACAAC |
| The U(-30)C crRNA mutant | AAATGATAAAAAAGGGTTTAAAAAATGAAAGTTGGAAGTGGAACTGCTCTCAT<br>TTTGGAGGGTAACCACAAC |
| The C(-8)G crRNA mutant  | AAATGATAAAAAAGGGTTTAAAAAATGAAAGTTGGAAGTGGAACTGCTCTCAT<br>TTTGGAGGGTAATCACAAC |
| The C(-8)U crRNA mutant  | AAATGATAAAAAAGGGTTTAAAAAATGAAAGTTGGAATTGCTCTCAT<br>TTTGGAGGGTAATCACAAC       |
| Target-1 RNA             | CAATTCATTTTTTAAACCCTTTTTTATCATTTAAGAAGATCAACTCTT<br>TATGTATTGATCTTCCT        |
| Target-2 RNA             | CAATTCATTTTTTAAACCCTTTTTTATCATTTAAGAAGATCAACTCTT<br>TATGTATTGATCTTCCT        |

---

201 **Supplementary information, Movie S1**

202

203 **Movie S1**

204 Surface representations, domain architecture and electrostatic potential surface of the  
205 BzCas13b-crRNA binary complex.

206
